# Supplementary material for: Prevalence, Characteristics, Management and Outcomes of Patients with Heart Failure with Preserved, Mildly Reduced, and Reduced Ejection Fraction in Spain
Source: MDPI journal article supplement (doi:10.3390/jcm11175199), 2022-09-02
Supplement: s1 [file s1]

**Supplementary table S1. Definition of the variables (codes).**

| ICD-9                                                                                                                                                                                                                                                                                                                                             | ICD-10                                                                                                                                                                                                                                                                                                                                                                                                                                                                                                                                           | Description                                                                                 |
|---------------------------------------------------------------------------------------------------------------------------------------------------------------------------------------------------------------------------------------------------------------------------------------------------------------------------------------------------|--------------------------------------------------------------------------------------------------------------------------------------------------------------------------------------------------------------------------------------------------------------------------------------------------------------------------------------------------------------------------------------------------------------------------------------------------------------------------------------------------------------------------------------------------|---------------------------------------------------------------------------------------------|
| 402.01, 402.11, 402.91                                                                                                                                                                                                                                                                                                                            | I11.0                                                                                                                                                                                                                                                                                                                                                                                                                                                                                                                                            | Hypertensive heart disease with heart failure                                               |
| 404.01, 404.11, 404.91                                                                                                                                                                                                                                                                                                                            | I13.0                                                                                                                                                                                                                                                                                                                                                                                                                                                                                                                                            | Hypertensive heart and renal disease with (congestive) heart failure                        |
| 404.03, 404.13, 404.93                                                                                                                                                                                                                                                                                                                            | I13.2                                                                                                                                                                                                                                                                                                                                                                                                                                                                                                                                            | Hypertensive heart and renal disease with both (congestive) heart failure and renal failure |
| 429.4, 997.1                                                                                                                                                                                                                                                                                                                                      | I97.1                                                                                                                                                                                                                                                                                                                                                                                                                                                                                                                                            | Other functional disturbances following cardiac surgery - Heart failure                     |
| 428.0                                                                                                                                                                                                                                                                                                                                             | I50.0                                                                                                                                                                                                                                                                                                                                                                                                                                                                                                                                            | Congestive Heart failure                                                                    |
| 428.1                                                                                                                                                                                                                                                                                                                                             | I50.1                                                                                                                                                                                                                                                                                                                                                                                                                                                                                                                                            | Left ventricular failure, unspecified                                                       |
| 428.2                                                                                                                                                                                                                                                                                                                                             | I50.2                                                                                                                                                                                                                                                                                                                                                                                                                                                                                                                                            | Systolic heart failure                                                                      |
| 428.3                                                                                                                                                                                                                                                                                                                                             | I50.3                                                                                                                                                                                                                                                                                                                                                                                                                                                                                                                                            | Diastolic heart failure                                                                     |
| 428.4                                                                                                                                                                                                                                                                                                                                             | I50.4                                                                                                                                                                                                                                                                                                                                                                                                                                                                                                                                            | Combined systolic and diastolic heart failure                                               |
| 428.9                                                                                                                                                                                                                                                                                                                                             | I50.9                                                                                                                                                                                                                                                                                                                                                                                                                                                                                                                                            | Heart failure, unspecified                                                                  |
| 238.72, 238.73, 280.0, 280.8, 280.9, 281.0, 281.1, 281.2, 281.3, 281.4, 281.8, 281.9, 282.0, 282.1, 282.2, 282.3, 282.5, 282.7, 282.8, 282.9, 282.40, 282.43, 282.44, 282.45, 282.46, 282.49, 282.61, 282.62, 82.68, 282.69, 283.0, 283.2, 283.9, 283.11, 283.19, 284.0, 284.8, 284.81, 284.89, 284.9, 285.0, 285.1, 285.8, 285.9, 285.22, 285.29 | D50.0, D50.1, D50.8, D50.9, D51.0, D51.1, D51.2, D51.3, D51.8, D51.9, D52.0, D52.1, D52.8, D52.9, D53.0, D53.1, D53.2, D53.8, D53.9, D55.0, D55.1, D55.2, D55.3, D55.8, D55.9, D56.0, D56.1, D56.2, D56.3, D56.4, D56.8, D56.9, D57.0, D57.1, D57.2, D57.3, D57.8, D58.0, D58.1, D58.2, D58.8, D58.9, D59.0, D59.1, D59.2, D59.3, D59.4, D59.5, D59.6, D59.8, D59.9, D60.0, D60.1, D60.8, D60.9, D61.0, D61.1, D61.2, D61.3, D61.8, D61.9, D62, D63.0, D63.8, D64.0, D64.1, D64.2, D64.3, D64.4, D64.8, D64.9, D46.0, D46.1, D46.2, D46.4, D46.5 | Anemia                                                                                      |

**Supplementary table S2. Incidence rates of HF.**

|                        | Number of patients<br>with HF <sup>1</sup> | Person<br>years <sup>2</sup> | Incidence per 100<br>person-years | 95% confidence<br>interval |
|------------------------|--------------------------------------------|------------------------------|-----------------------------------|----------------------------|
| <b>All HF patients</b> |                                            |                              |                                   |                            |
| Overall                | 20,063                                     | 6,204,285                    | 0.32                              | 0.32-0.32                  |
| 2013                   | 2,680                                      | 978,454                      | 0.27                              | 0.27-0.27                  |
| 2014                   | 2,669                                      | 874,485                      | 0.31                              | 0.30-0.31                  |
| 2015                   | 2,708                                      | 878,662                      | 0.31                              | 0.30-0.31                  |
| 2016                   | 3,155                                      | 940,391                      | 0.34                              | 0.33-0.34                  |
| 2017                   | 2,971                                      | 914,202                      | 0.32                              | 0.32-0.33                  |
| 2018                   | 3,460                                      | 924,621                      | 0.37                              | 0.37-0.38                  |
| 2019*                  | 2,420                                      | 693,470                      | 0.35                              | 0.35-0.35                  |
| <b>HFrEF</b>           |                                            |                              |                                   |                            |
| Overall                | 8,745                                      | 6,199,443                    | 0.14                              | 0.14-0.14                  |
| 2013                   | 1,230                                      | 977,850                      | 0.13                              | 0.12-0.13                  |
| 2014                   | 1,109                                      | 873,792                      | 0.13                              | 0.12-0.13                  |
| 2015                   | 1,198                                      | 878,021                      | 0.14                              | 0.13-0.14                  |
| 2016                   | 1,430                                      | 939,629                      | 0.15                              | 0.15-0.15                  |
| 2017                   | 1,340                                      | 913,531                      | 0.15                              | 0.14-0.15                  |
| 2018                   | 1,373                                      | 923,811                      | 0.15                              | 0.15-0.15                  |
| 2019*                  | 1,065                                      | 692,808                      | 0.15                              | 0.15-0.15                  |
| <b>HFpEF</b>           |                                            |                              |                                   |                            |
| Overall                | 5,266                                      | 6,197,943                    | 0.09                              | 0.08- 0.09                 |
| 2013                   | 672                                        | 977,633                      | 0.07                              | 0.07-0.07                  |
| 2014                   | 743                                        | 873,660                      | 0.09                              | 0.08-0.09                  |
| 2015                   | 718                                        | 877,747                      | 0.08                              | 0.08-0.08                  |
| 2016                   | 785                                        | 939,411                      | 0.08                              | 0.08-0.08                  |
| 2017                   | 762                                        | 913,285                      | 0.08                              | 0.08-0.08                  |
| 2018                   | 923                                        | 923,600                      | 0.10                              | 0.09- 0.10                 |
| 2019*                  | 663                                        | 692,607                      | 0.10                              | 0.09 -0.10                 |
| <b>HFmrEF</b>          |                                            |                              |                                   |                            |
| Overall                | 1,026                                      | 6,196,141                    | 0.02                              | 0.01-0.02                  |
| 2013                   | 85                                         | 977,407                      | 0.01                              | 0.01-0.01                  |
| 2014                   | 150                                        | 873,404                      | 0.01                              | 0.01-0.01                  |
| 2015                   | 193                                        | 877,546                      | 0.02                              | 0.02-0.02                  |
| 2016                   | 120                                        | 939,108                      | 0.01                              | 0.01-0.01                  |
| 2017                   | 161                                        | 913,015                      | 0.02                              | 0.02-0.02                  |
| 2018                   | 209                                        | 923,318                      | 0.02                              | 0.02-0.02                  |
| 2019*                  | 108                                        | 692,343                      | 0.02                              | 0.01- 0.02                 |
| <b>HFuEF</b>           |                                            |                              |                                   |                            |
| Overall                | 5,026                                      | 6,197,842                    | 0.08                              | 0.08-0.08                  |
| 2013                   | 693                                        | 977,673                      | 0.07                              | 0.07-0.07                  |
| 2014                   | 667                                        | 873,627                      | 0.08                              | 0.07-0.08                  |
| 2015                   | 599                                        | 877,732                      | 0.07                              | 0.07-0.07                  |
| 2016                   | 820                                        | 939,399                      | 0.09                              | 0.08-0.09                  |
| 2017                   | 708                                        | 913,220                      | 0.08                              | 0.08-0.08                  |
| 2018                   | 955                                        | 923,590                      | 0.10                              | 0.10-0.10                  |
| 2019*                  | 584                                        | 692,601                      | 0.08                              | 0.08-0.08                  |

Abbreviations: HF = Heart failure; HFmrEF = Heart failure with mildly reduced ejection fraction; HFpEF = Heart Failure with preserved ejection fraction; HFrEF = Heart failure with reduced ejection fraction; HFuEF = Heart Failure with unspecified ejection fraction.

1. Number of patients who have a new qualifying HF diagnosis during the year.

2. Total person time contributed by all adults from the start of the year until the earliest of a qualifying HF diagnosis, death, the study end date, and loss to follow-up.

\*year 2019 includes until September.

**Supplementary table S3. Annual prevalence of HF.**

|                        | No. of Patients with HF <sup>1</sup> (HFrEF ≤40%) | Total number of patients <sup>2</sup> | Prevalence (%) | 95% confidence interval (%) |
|------------------------|---------------------------------------------------|---------------------------------------|----------------|-----------------------------|
| <b>All HF patients</b> |                                                   |                                       |                |                             |
| Overall                | 43,578                                            | 1,865,061                             | 2.34           | 2.32 - 2.36                 |
| 2013                   | 20,628                                            | 995,381                               | 2.07           | 2.04 - 2.10                 |
| 2014                   | 20,634                                            | 902,303                               | 2.29           | 2.26 - 2.32                 |
| 2015                   | 21,209                                            | 911,618                               | 2.33           | 2.30 - 2.36                 |
| 2016                   | 21,400                                            | 989,220                               | 2.16           | 2.13 - 2.19                 |
| 2017                   | 22,060                                            | 971,683                               | 2.27           | 2.24 - 2.30                 |
| 2018                   | 23,344                                            | 956,461                               | 2.44           | 2.41 - 2.47                 |
| 2019*                  | 23,931                                            | 1,009,806                             | 2.37           | 2.34 - 2.40                 |
| <b>HFrEF</b>           |                                                   |                                       |                |                             |
| Overall                | 20,901                                            | 1,865,061                             | 1.12           | 1.10 - 1.14                 |
| 2013                   | 10,485                                            | 995,381                               | 1.05           | 1.03 - 1.07                 |
| 2014                   | 10,082                                            | 902,303                               | 1.12           | 1.10 - 1.14                 |
| 2015                   | 10,304                                            | 911,618                               | 1.13           | 1.11 - 1.15                 |
| 2016                   | 10,396                                            | 989,220                               | 1.05           | 1.03 - 1.07                 |
| 2017                   | 10,727                                            | 971,683                               | 1.10           | 1.08 - 1.12                 |
| 2018                   | 11,166                                            | 956,461                               | 1.17           | 1.15 - 1.19                 |
| 2019*                  | 11,828                                            | 1,009,806                             | 1.17           | 1.15 - 1.19                 |
| <b>HFpEF</b>           |                                                   |                                       |                |                             |
| Overall                | 16,963                                            | 1,865,061                             | 0.91           | 0.90 - 0.92                 |
| 2013                   | 7,661                                             | 995,381                               | 0.77           | 0.75 - 0.79                 |
| 2014                   | 7,949                                             | 902,303                               | 0.88           | 0.86 - 0.90                 |
| 2015                   | 8,183                                             | 911,618                               | 0.90           | 0.88 - 0.92                 |
| 2016                   | 8,246                                             | 989,220                               | 0.83           | 0.81 - 0.85                 |
| 2017                   | 8,455                                             | 971,683                               | 0.87           | 0.85 - 0.89                 |
| 2018                   | 9,027                                             | 956,461                               | 0.94           | 0.92 - 0.96                 |
| 2019*                  | 9,083                                             | 1,009,806                             | 0.90           | 0.88 - 0.92                 |
| <b>HFmrEF</b>          |                                                   |                                       |                |                             |
| Overall                | 1,852                                             | 1,865,061                             | 0.10           | 0.10 - 0.10                 |
| 2013                   | 866                                               | 995,381                               | 0.09           | 0.08 - 0.10                 |
| 2014                   | 894                                               | 902,303                               | 0.10           | 0.09 - 0.11                 |
| 2015                   | 875                                               | 911,618                               | 0.10           | 0.09 - 0.11                 |
| 2016                   | 903                                               | 989,220                               | 0.09           | 0.08 - 0.10                 |
| 2017                   | 982                                               | 971,683                               | 0.10           | 0.09 - 0.11                 |
| 2018                   | 1,058                                             | 956,461                               | 0.11           | 0.10 - 0.12                 |
| 2019*                  | 1,041                                             | 1,009,806                             | 0.10           | 0.09 - 0.11                 |
| <b>HFuEF</b>           |                                                   |                                       |                |                             |
| Overall                | 3,862                                             | 1,865,061                             | 0.21           | 0.20 - 0.22                 |
| 2013                   | 1,616                                             | 995,381                               | 0.16           | 0.15 - 0.17                 |
| 2014                   | 1,709                                             | 902,303                               | 0.19           | 0.18 - 0.20                 |
| 2015                   | 1,847                                             | 911,618                               | 0.20           | 0.19 - 0.21                 |
| 2016                   | 1,855                                             | 989,220                               | 0.19           | 0.18 - 0.20                 |
| 2017                   | 1,896                                             | 971,683                               | 0.20           | 0.19 - 0.21                 |
| 2018                   | 2,093                                             | 956,461                               | 0.22           | 0.21 - 0.23                 |
| 2019*                  | 1,979                                             | 1,009,806                             | 0.20           | 0.19 - 0.21                 |

Abbreviations: HF = Heart failure; HFmrEF = Heart failure with mildly reduced ejection fraction; HFpEF = Heart Failure with preserved ejection fraction; HFrEF = Heart failure with reduced ejection fraction; HFuEF = Heart Failure with unspecified ejection fraction.

1. Number of patients who had a qualifying HF diagnosis before the beginning of the year.

2. All adult patients alive and enrolled as of the beginning of the calendar year and who have been continuously enrolled during the entire year prior.

\*year 2019 includes until September.

**Supplementary table S4. Event Rates of myocardial infarction, stroke and HF hospitalization in the prevalent HF Cohort (2016 cohort only).**

|                    | All HF (N=21297)          |                    |                          | HFrEF (N=10323)           |                    |                        | HFmrEF (N=903)            |                    |                      |                        | HFpEF (N=8225)            |                    |                        |                        | HFpEF (50 to <60) (N=2995) |                    |                        | HFpEF (≥60) (N=5230)      |                    |                        | HFuEF (N=1846)            |                    |                      |
|--------------------|---------------------------|--------------------|--------------------------|---------------------------|--------------------|------------------------|---------------------------|--------------------|----------------------|------------------------|---------------------------|--------------------|------------------------|------------------------|----------------------------|--------------------|------------------------|---------------------------|--------------------|------------------------|---------------------------|--------------------|----------------------|
|                    | Patients with outcome (n) | Total person-years | Rate*<br>(95% CI)        | Patients with Outcome (n) | Total person-years | Rate*<br>(95% CI)      | Patients with Outcome (n) | Total person-years | Rate*<br>(95% CI)    | p-value (versus HFrEF) | Patients with outcome (n) | Total person-years | Rate*<br>(95% CI)      | p-value (versus HFrEF) | Patients with outcome (n)  | Total person-years | Rate*<br>(95% CI)      | Patients with outcome (n) | Total person-years | Rate*<br>(95% CI)      | Patients with outcome (n) | Total person-years | Rate*<br>(95% CI)    |
| MI                 | 761                       | 17.495             | 43.5<br>(31.2 - 60.4)    | 429                       | 8.492              | 50.5<br>(33.5-75.5)    | 32                        | 746                | 42.9<br>(9.4-174.3)  | 0.707                  | 238                       | 6.737              | 35.3<br>(18.3-67.1)    | <0.001                 | 83                         | 2.455              | 33.8<br>(11.2-97.7)    | 155                       | 4.283              | 36.2<br>(16.3-78.5)    | 62                        | 1.519              | 40.8<br>(12.8-122.4) |
| Stroke             | 613                       | 17.495             | 35.0<br>(23.1 - 52.7)    | 367                       | 8.492              | 43.2<br>(26.7-69.2)    | 14                        | 746                | 18.8<br>(1.1-243.6)  | 0.034                  | 191                       | 6.737              | 28.3<br>(12.6-62.7)    | <0.001                 | 75                         | 2.455              | 30.5<br>(9.5-97.8)     | 116                       | 4.283              | 27.1<br>(9.5-75)       | 41                        | 1.519              | 27<br>(5.1-129.9)    |
| HF hospitalization | 4051                      | 17.495             | 231.6<br>(218.8 - 244.8) | 2269                      | 8.492              | 267.2<br>(249.4-285.8) | 144                       | 746                | 193<br>(136.8-265.1) | <0.001                 | 1332                      | 6.737              | 197.7<br>(177.2-219.9) | <0.001                 | 477                        | 2.455              | 194.3<br>(161.3-232.2) | 855                       | 4.283              | 199.6<br>(174.2-227.7) | 306                       | 1.519              | 201.5<br>(160.3-250) |

Abbreviations: CI = Confidence interval; HF = Heart failure, HFmrEF = Heart failure with mildly reduced ejection fraction; HFpEF = Heart Failure with preserved ejection fraction; HFrEF = Heart failure with reduced ejection fraction; HFuEF = Heart Failure with unspecified ejection fraction; MI = Myocardial infarction.

\*Rate per 1,000 person-years (95% confidence interval)
